# Supplementary material
Source: Springer Nature journal article supplement (https://www.springermedizin.de/resource/supplementary/12960_2003_8_MOESM3_ESM.pdf/9569742)

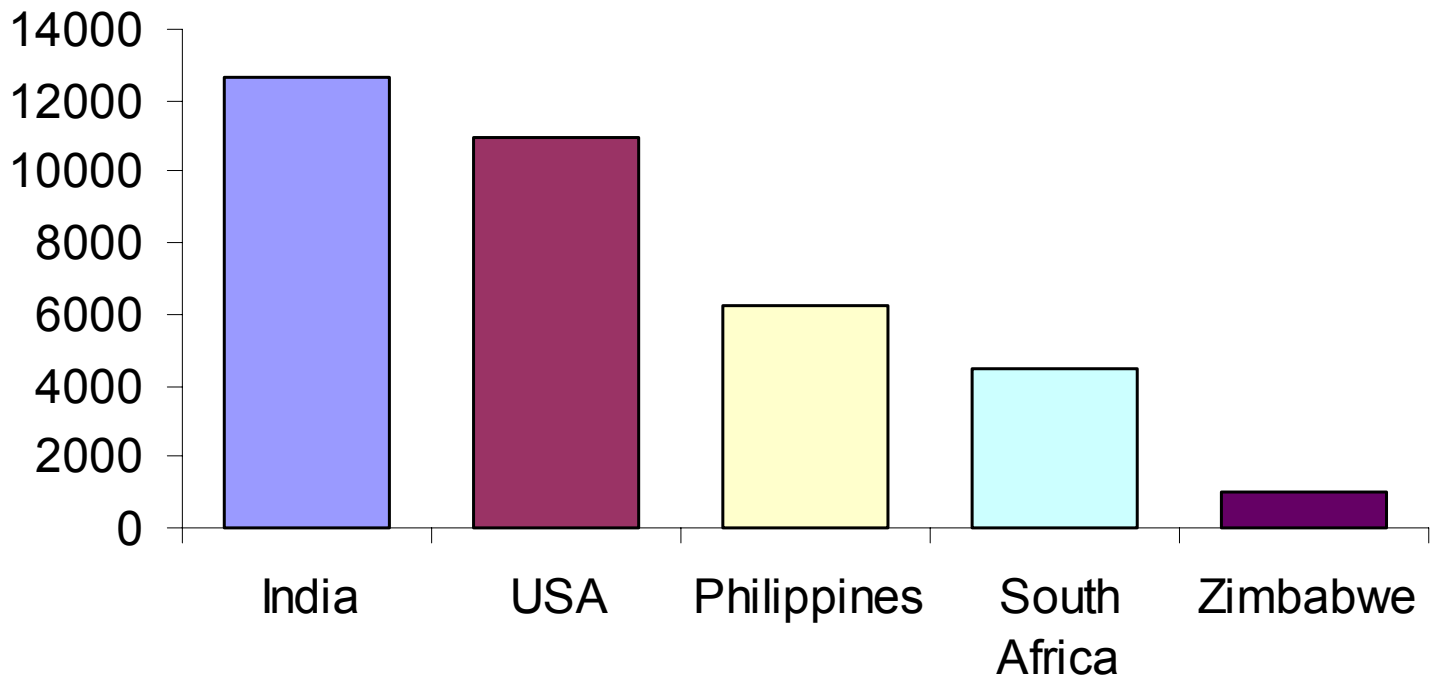

Source: Work permits UK: <http://www.workpermits.gv.uk/board/volumes>

Supplement: MOESM3 [file 9569742]
